# Supplementary material
Source: PubMed Central journal article supplement (PMC4252627)

**Supplemental figure 1** Distribution of hot flashes across the night.  
Distribution of hot flashes associated with or without an awakening and those that occurred when the women were already awake as a function of hours after lights-out. Six hot flashes occurred in hour 9 but the data are not displayed since women were in bed longer than 8 hours for only a third of the nights (33.3%).

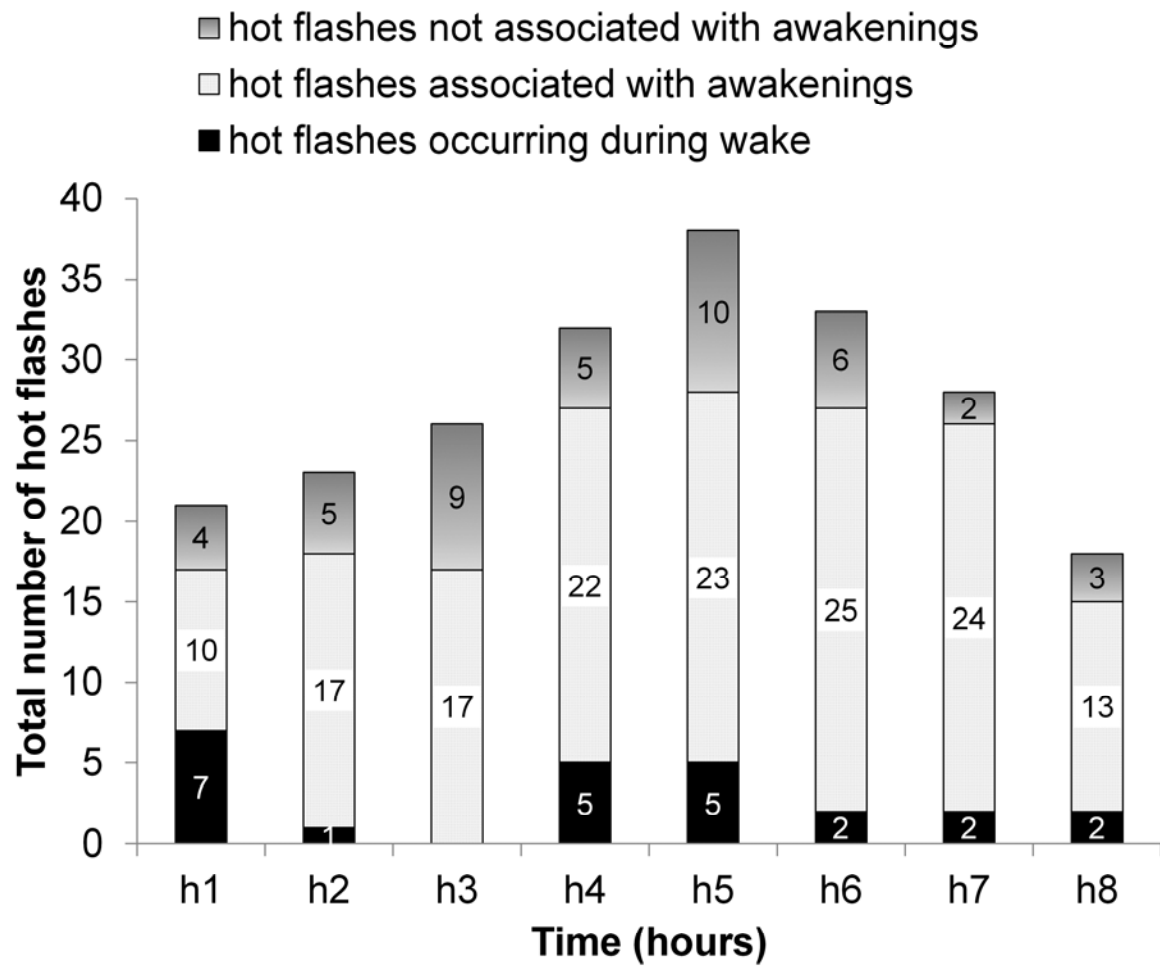

Supplement: NIHMS631070-supplement-01.pdf [file NIHMS631070-supplement-01.pdf]
